# Supplementary material for: Mitigation of PM 2.5 and Ozone Pollution in Delhi: A Sensitivity Study during the Pre-monsoon period
Source: Copernicus journal article supplement (doi:10.5194/acp-2019-618), 2019-08-01
Supplement: Supplementary file 1 [file acp-2019-618-supplement.pdf]

1 Supporting Information

2 for

3  
4 **Mitigation of PM<sub>2.5</sub> and Ozone Pollution in Delhi: A Sensitivity Study**  
5 **during the Pre-monsoon period**

6 Ying Chen<sup>1,2\*</sup>, Oliver Wild<sup>1,2</sup>, Edmund Ryan<sup>1,9</sup>, Saroj Kumar Sahu<sup>4</sup>, Douglas Lowe<sup>5</sup>, Scott Archer-  
7 Nicholls<sup>6</sup>, Yu Wang<sup>5</sup>, Gordon McFiggans<sup>5</sup>, Tabish Ansari<sup>1</sup>, Vikas Singh<sup>7</sup>, Ranjeet Sokhi<sup>8</sup>, Alex  
8 Archibald<sup>6</sup>, Gufran Beig<sup>3</sup>

9 <sup>1</sup>Lancaster Environment Centre, Lancaster University, Lancaster, LA1 4YQ, UK

10 <sup>2</sup>Data Science Institute, Lancaster University, Lancaster, LA1 4YW, UK

11 <sup>3</sup>Indian Institute of Tropical Meteorology, Pune, India

12 <sup>4</sup>Environmental Science, Dept. of Botany, Utkal University, Bhubaneswar, India

13 <sup>5</sup>Centre for Atmospheric Sciences, School of Earth, Atmospheric and Environmental Sciences, University of Manchester,  
14 Manchester, UK

15 <sup>6</sup>NCAS-Climate, Department of Chemistry, University of Cambridge, Cambridge, UK

16 <sup>7</sup>National Atmospheric Research Laboratory, Gadanki, AP, India

17 <sup>8</sup>Centre for Atmospheric and Climate Physics Research, University of Hertfordshire, Hatfield, Hertfordshire, UK

18 <sup>9</sup>School of Mathematics, University of Manchester, Manchester, UK

19  
20 *Correspondence to: Ying Chen (y.chen65@lancaster.ac.uk)*

21  
22  
23

|    |                                                                                               |
|----|-----------------------------------------------------------------------------------------------|
| 24 | <b>Contents of this file</b>                                                                  |
| 25 | <b>Texts:</b>                                                                                 |
| 26 | Text S1 – Comparison between results of domain-03 and domain-04.                              |
| 27 | Text S2 – Comparison between simulations driven by ECMWF and NCEP datasets.                   |
| 28 | Text S3 – Regional influence of Delhi urban plume                                             |
| 29 |                                                                                               |
| 30 | <b>Tables:</b>                                                                                |
| 31 | Table S1 – Observational network in Delhi;                                                    |
| 32 | Table S2 – Design of training runs for building Gaussian process emulator.                    |
| 33 |                                                                                               |
| 34 | <b>Figures:</b>                                                                               |
| 35 | Figure S1 – Validation of modelled PM <sub>2.5</sub> ;                                        |
| 36 | Figure S2 – Diurnal pattern of PM <sub>2.5</sub> at roadside site (DEU);                      |
| 37 | Figure S3 – Chemical components of modelled PM <sub>2.5</sub> ;                               |
| 38 | Figure S4 – Diurnal pattern of NO <sub>x</sub> from sensitivity simulations and observations; |
| 39 | Figure S5 – Validation of modelled O <sub>3</sub> and NO <sub>x</sub> ;                       |
| 40 | Figure S6 – Diurnal patterns of O <sub>3</sub> ;                                              |
| 41 | Figure S7 – Response surfaces of NO <sub>x</sub> emulation results;                           |
| 42 | Figure S8 – Comparisons between observation and domain-03/04 results;                         |
| 43 | Figure S9 – Comparisons of modelled temperature and RH;                                       |
| 44 | Figure S10 – Comparisons of modelled wind pattern;                                            |
| 45 | Figure S11 – Regional influence of Delhi urban plume.                                         |
| 46 |                                                                                               |
| 47 |                                                                                               |
| 48 |                                                                                               |

## 49 **S1. Comparisons between observations and model results of domain-03 and domain-04**

50

51 The model (driven by ECMWF) results of domain-03 (D03, 5 km) and domain-04 (D04,  
52 1.67 km) are compared with observations, as shown in Fig. S8. One can see that the model  
53 performance is not improved with higher resolution in D04. The median and mean values of  
54  $PM_{2.5}$  and ozone from D03 simulation agree well with observations, although there is slightly  
55 overestimation of  $NO_x$ . The  $PM_{2.5}$  and  $NO_x$ , which are mainly primary pollutants, are even  
56 more overestimated by D04 than by D03. The secondary pollutant ozone is therefore more  
57 underestimated by D04, due to depleted by too much  $NO_x$ . These may imply an overestimation  
58 of  $NO_x$  emission in the inventory and/or an underestimation of horizontal mixing efficiency in  
59 the WRF-Chem model with high resolution simulations.

60

61

## 62 **S2. Comparison between simulations driven by ECMWF and NCEP datasets**

63 The model performance of meteorology simulation is validated by the measurements in  
64 Delhi as shown in Fig. S9 (temperature-T and relative humidity-RH) and Fig. S10 (wind  
65 pattern). Both simulations driven by ECMWF and NCEP datasets reproduce the T very well  
66 with averaged factor around 1 and  $R=0.9$  compared with measurements, although some  
67 underestimations can be found in the results driven by ECMWF when T is less than  $35^\circ C$ . The  
68 model results driven by ECMWF reproduce RH fairly well ( $R=0.7$ ), and much better than the  
69 NCEP one ( $R=0.4$ ). The model results driven by NCEP under-predict RH by 20-40%, despite  
70 an underestimation in high RH regime ( $RH>50\%$ ) can also be observed in the results driven by  
71 ECMWF. These findings are consistent with a recent study (Chatani and Sharma, 2018), which  
72 shows the WRF-Chem driven by ECMWF can reproduce much better meteorological  
73 conditions compared with observations over India than the driven by NCEP. They also reported  
74 that this is a general situation over the whole year (2010) of India and North Pakistan simulation,  
75 but the pre-monsoon (April-May) possibly experiences the largest underestimation of RH by

76 more than 20% over Delhi in the results driven by NCEP. The observed wind pattern,  
77 dominated by the West-North wind direction, is reasonably captured by simulations driven by  
78 both ECMWF and NCEP (Fig. S10). Simulation driven by NCEP produces slightly better wind  
79 direction than the one driven by ECMWF, but with a slight overestimation of wind speed can  
80 be observed as indicated by less blue colour regions in Fig. S10b.

81 The model driven by NCEP data predicts slightly lower  $PM_{2.5}$  (Fig. S1-S2) and very close  
82  $O_3$  (Fig. S5-S6) concentrations compared to the ECMWF driven one, although a large  
83 difference in relative humidity can be found. The lower  $PM_{2.5}$  values from NCEP driven results  
84 possibly due to the higher height of PBL, which can approach ~3500 meter during afternoon  
85 in contrast of ~2500 meter of the ECMWF driven one. The deeper PBL dilutes the fresh emitted  
86  $PM_{2.5}$  in the surface layer. This can be especially important in Delhi, where primary particles  
87 are the major contributor to  $PM_{2.5}$  during pre-monsoon (see section 3.1), and secondary  
88 inorganic aerosol (SIA), including sulphate, nitrate and ammonium, only contributes 20-25%  
89 of  $PM_{2.5}$  loading in both ECMWF and NCEP results. It is worth noting that the difference in  
90 relative humidity results between model driven by ECMWF and NCEP may have a larger  
91 impact on  $PM_{2.5}$  loading and SIA formation during winter period in Delhi when the atmosphere  
92 is more humid.

93 In general, the model driven by ECMWF can produce better meteorological conditions  
94 and  $PM_{2.5}$  results than the NCEP driven one, while similar  $O_3$  results are found. In this study,  
95 our baseline simulation is driven by ECMWF dataset.

96

97

98

### 99 **S3 Regional Influence of the Delhi Urban Plume**

100 The pollution plume from local emissions in Delhi can also influence downwind regions,  
101 particularly to the southeast of Delhi in this season due to the prevailing northwest wind. Fig.  
102 S11 shows the spatial distribution of SIs corresponding to traffic emissions for  $PM_{2.5}$  and  $O_3$   
103 over Delhi and nearby regions. We consider only the local traffic sector (TRA) here, since it is  
104 the governing factor for both  $PM_{2.5}$  and  $O_3$  in Delhi, and the major contributor of primary  $PM_{2.5}$   
105 and  $NO_x$ . In this study, we use  $O_3$  peak hour (15:00 LT) with the fully developed PBL to  
106 represent the influence of plume in daytime. And we use the early morning before PBL  
107 development (05:00 LT) to represent the influence in night, which shows a strong regional  
108 interaction indicated by the highest sensitivity of  $PM_{2.5}$  to the emissions from NCR emissions  
109 (Fig. 4a). In general, the Delhi urban plume has a broader influence at night, possibly facilitated  
110 by favourable meteorological conditions of strong regional interactions. The  $NO_x$ -rich urban  
111 plume depletes  $O_3$  in downwind regions during the night with sensitivity larger than 70%, in  
112 contrast of a negligible sensitivity ( $<10\%$ ) for  $PM_{2.5}$ . This indicates that Delhi urban plume has  
113 a larger and broader impact on  $O_3$  than on  $PM_{2.5}$  in the downwind regions.

114

115

**Table S1.** SAFAR network measurements in Delhi.

| <b>No.</b> | <b>Station Name</b> | <b>Short Name</b> | <b>Latitude</b> | <b>Longitude</b> | <b>PM<sub>2.5</sub></b> | <b>O<sub>3</sub></b> | <b>NO<sub>x</sub></b> | <b>Meteorology</b> | <b>Environment Describe</b>  |
|------------|---------------------|-------------------|-----------------|------------------|-------------------------|----------------------|-----------------------|--------------------|------------------------------|
| 1          | C V Raman           | CVR               | 28.72           | 77.20            | Yes                     | --                   | --                    | --                 | Downtown                     |
| 2          | Delhi University    | DEU               | 28.69           | 77.21            | Yes                     | --                   | --                    | --                 | Highly populated Residential |
| 3          | Airport T3          | AIR               | 28.56           | 77.10            | --                      | Yes                  | Yes                   | --                 | Airport city side            |
| 4          | Ayanagar            | AYA               | 28.48           | 77.13            | --                      | Yes                  | --                    | Yes                | Suburban background          |
| 5          | NCMRWF              | NCM               | 28.62           | 77.36            | --                      | Yes                  | --                    | Yes                | Industrial, Upwind Entry     |
| 6          | Pusa                | PUS               | 28.64           | 77.17            | --                      | --                   | --                    | Yes                | Background                   |

**Table S2.** Design of training runs for building Gaussian process emulator.

| Training Runs<br>No. | Factors for each emission sector |                      |                           |                              |
|----------------------|----------------------------------|----------------------|---------------------------|------------------------------|
|                      | DOM<br>(area source)             | TRA<br>(line source) | POW+IND<br>(point source) | NCR*<br>(regional transport) |
| 1                    | 1.2958                           | 0.87408              | 1.0316                    | 0.33741                      |
| 2                    | 0.75507                          | 1.556                | 1.8606                    | 0.45469                      |
| 3                    | 0.48991                          | 0.95171              | 0.22896                   | 1.416                        |
| 4                    | 1.4326                           | 1.779                | 0.63716                   | 1.3508                       |
| 5                    | 1.3191                           | 0.40663              | 0.59954                   | 1.1988                       |
| 6                    | 0.067129                         | 0.023068             | 1.1011                    | 0.50473                      |
| 7                    | 0.92064                          | 1.83                 | 0.19348                   | 0.06012                      |
| 8                    | 0.1336                           | 0.19012              | 0.38896                   | 0.87948                      |
| 9                    | 0.37848                          | 1.449                | 0.90053                   | 1.0461                       |
| 10                   | 1.6056                           | 0.51501              | 0.013731                  | 0.75497                      |
| 11                   | 0.51618                          | 1.2396               | 1.7039                    | 1.208                        |
| 12                   | 1.12                             | 0.62141              | 1.3866                    | 0.96124                      |
| 13                   | 0.84394                          | 0.20906              | 0.4144                    | 1.8251                       |
| 14                   | 0.60487                          | 0.3878               | 1.6648                    | 1.7574                       |
| 15                   | 1.5254                           | 1.991                | 1.4452                    | 1.5008                       |
| 16                   | 1.784                            | 1.629                | 0.87087                   | 0.23874                      |
| 17                   | 1.8007                           | 1.0225               | 1.2664                    | 1.6046                       |
| 18                   | 1.0119                           | 1.1866               | 1.5495                    | 1.9241                       |
| 19                   | 0.26926                          | 0.73029              | 0.79889                   | 0.17177                      |
| 20                   | 1.9168                           | 1.3829               | 1.9492                    | 0.66879                      |

\*Emissions in the National Capital Region surrounding Delhi (domain-03 as shown in Fig. 1), representing the influence of regional transport from surrounding Delhi.

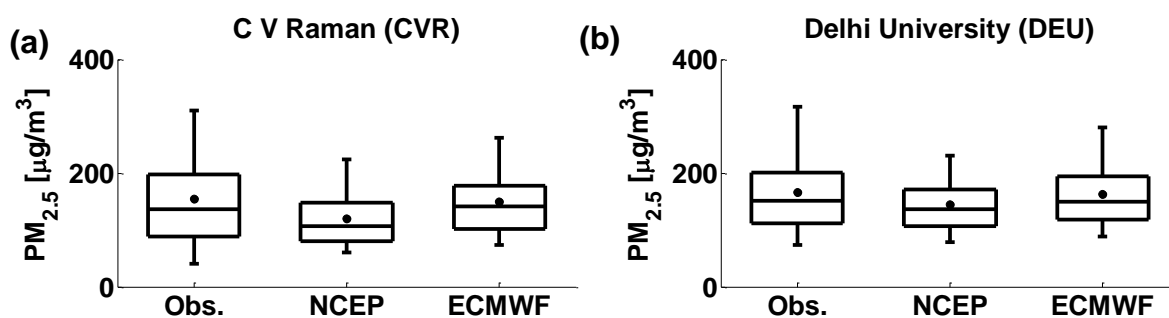

**Figure S1.** Comparison of the frequency distributions of observed and modelled (driven by NCEP and ECMWF datasets) hourly PM<sub>2.5</sub> concentrations. (a) CVR; (b) DEU. The boxplots show the median, mean (black dot), 25% percentile, 75% percentile, 95% percentile and 5% percentile values.

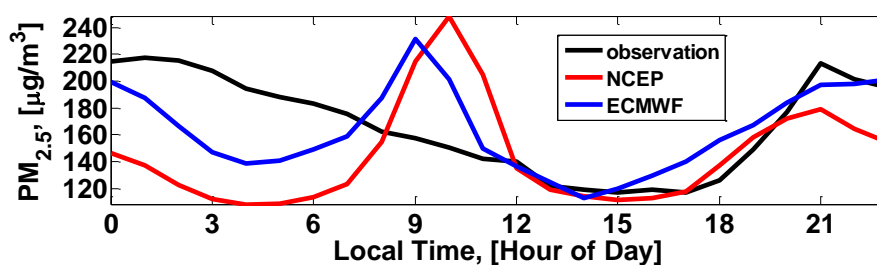

**Figure S2.** Diurnal patterns of PM<sub>2.5</sub> at DEU site (marked in Fig. 2). The results are averaged during 02-15 May 2015.

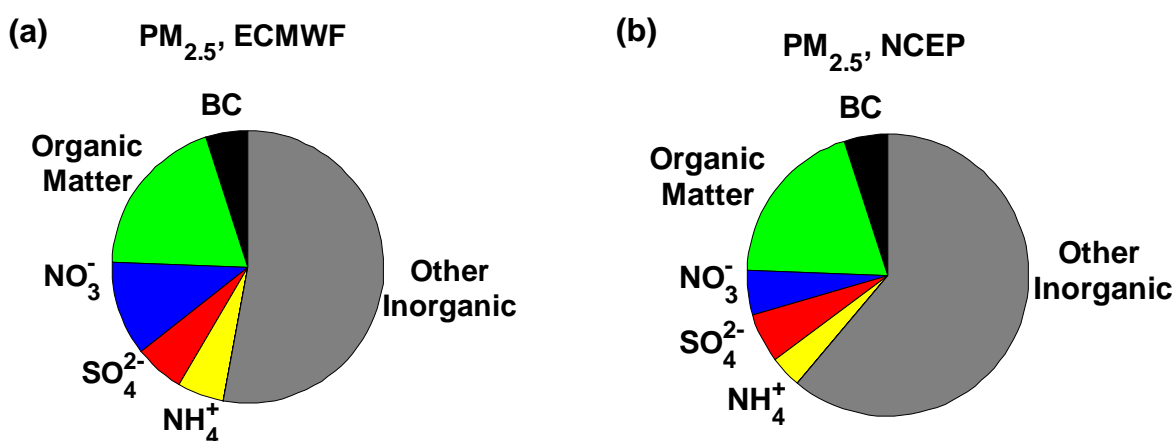

**Figure S3.** The simulated compositions of PM<sub>2.5</sub> at Delhi city background site (PUS). The modelled masses of each compounds are averaged during 02-15 May 2015. (a) drive by ECMWF data; (b) drive by NCEP data.



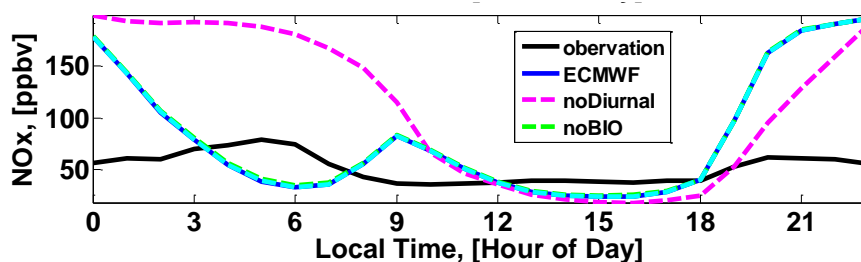

**Figure S4.** Diurnal patterns of NO<sub>x</sub> concentration from WRF-Chem model and observational results at AIR site (marked in Fig. 2). The results are averaged during 02-15 May 2015. Note that ‘NCEP’ and ‘ECMWF’ indicates the model results driven by NCEP and ECMWF reanalysis data, respectively.

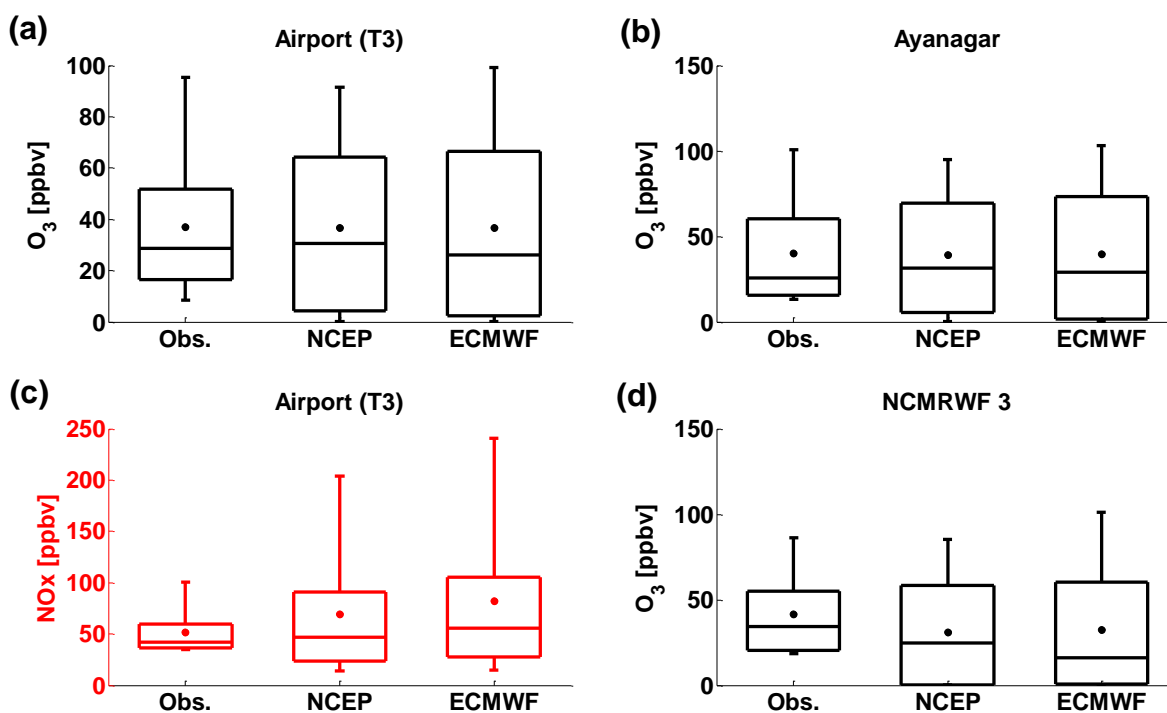

**Figure S5.** Comparison of the frequency distributions of observed and modelled hourly results (driven by NCEP and ECMWF datasets). (a) O<sub>3</sub> at AIR; (b) O<sub>3</sub> at AYA; (c) NO<sub>x</sub> at AIR; (d) O<sub>3</sub> at NCM. The boxplots show the median, mean (black dot), 25% percentile, 75% percentile, 95% and 5% values.

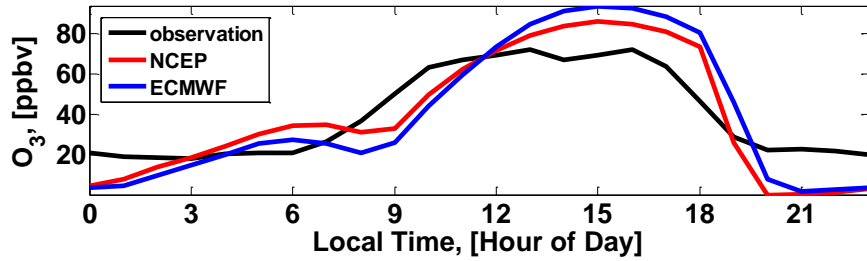

**Figure S6.** Diurnal patterns of  $O_3$  at AYA, similar as Fig. S2. The ‘NCEP’ and ‘ECMWF’ indicate the model results driven by NCEP and ECMWF datasets, respectively.

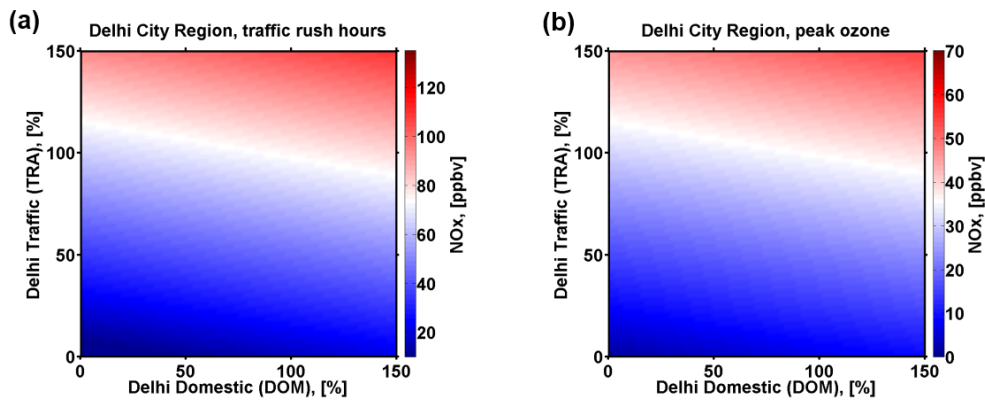

**Figure S7.** Response surfaces for  $NO_x$  concentrations over Delhi City Region as a function of local traffic and domestic emissions in Delhi, during average rush hour (a) and ozone peak period (b).

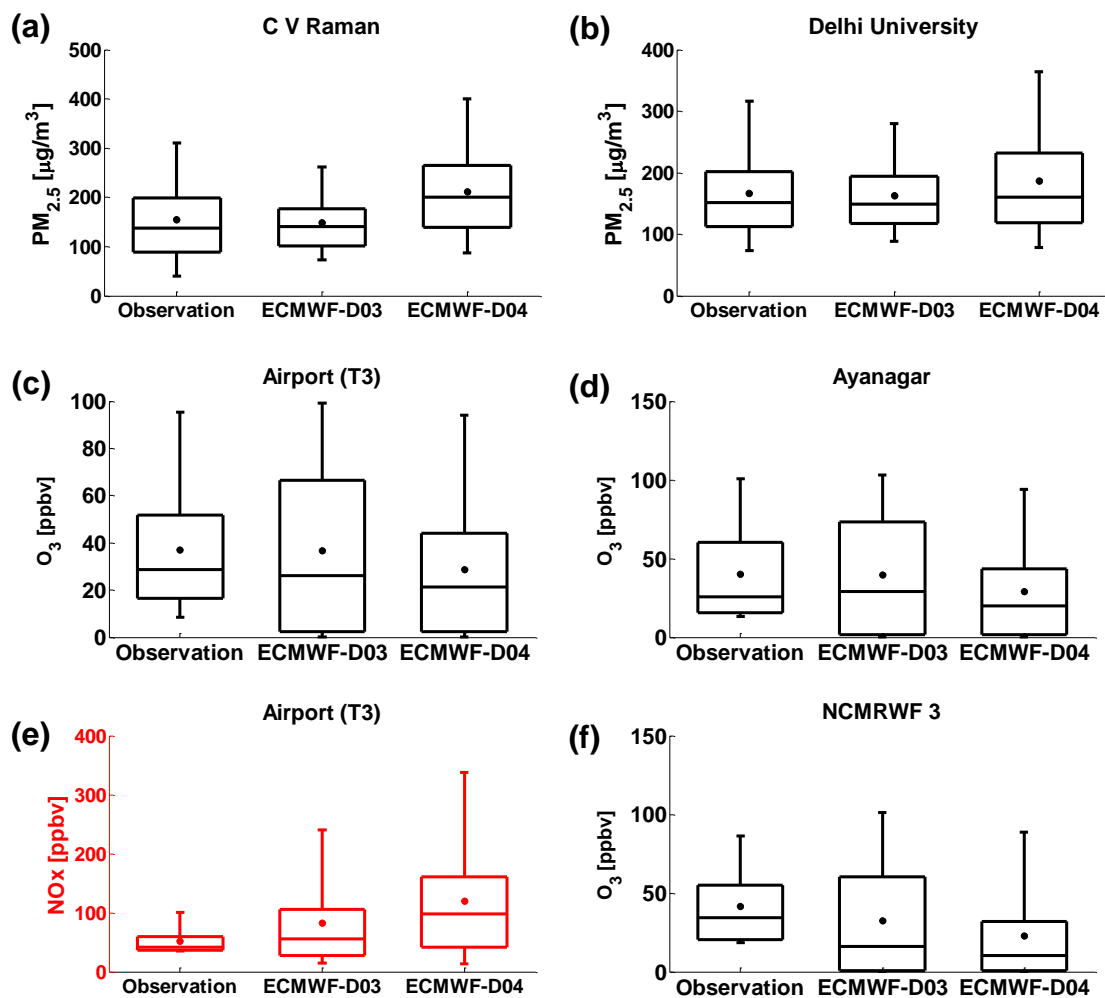

**Figure S8.** Comparisons of frequency distributions between observations and model results of domain-03 and domain-04. (a)  $PM_{2.5}$  at CVR; (b)  $PM_{2.5}$  at DEU; (c)  $O_3$  at AIR; (d)  $O_3$  at AYA; (e)  $NO_x$  at AIR; (f)  $O_3$  at NCM. The WRF-Chem model was driven by ECMWF dataset.

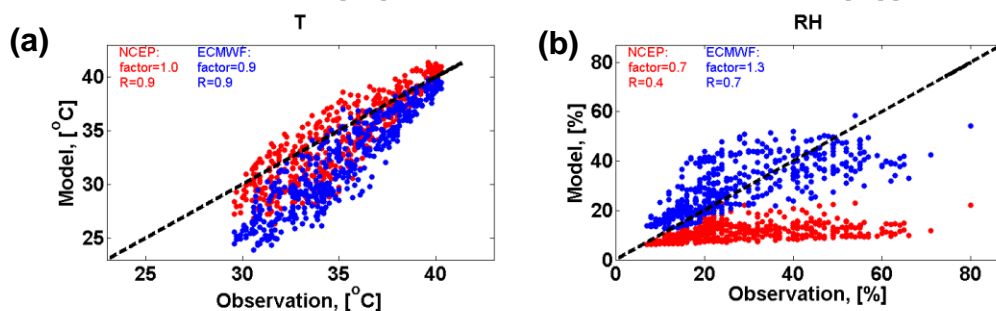

**Figure S9.** Comparisons of modelled meteorological conditions with all measurements over Delhi. (a) temperature (T); (b) RH. The red dots indicate the results of WRF-Chem driven by NCEP reanalysis data, blue dots indicate the results of WRF-Chem driven by ECMWF reanalysis data, and the black dashed line indicates the 1:1 line. The measurement sites are given in Table S1, and the corresponding model results are extracted.

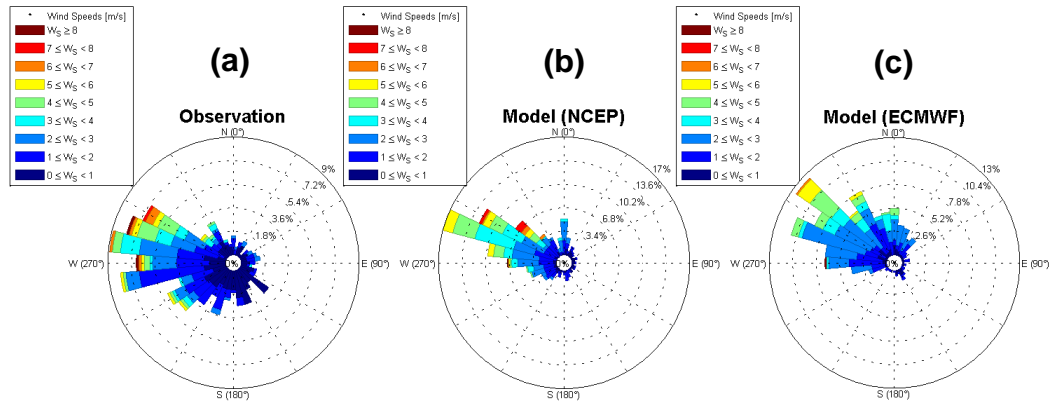

**Figure S10.** Wind rose pattern of measurements and modelled wind pattern over Delhi. The results from all sites are shown. (a) observations; (b) model driven by NCEP; (c) model driven by ECMWF. The measurement sites are given in Table S1, and the corresponding model results are extracted.

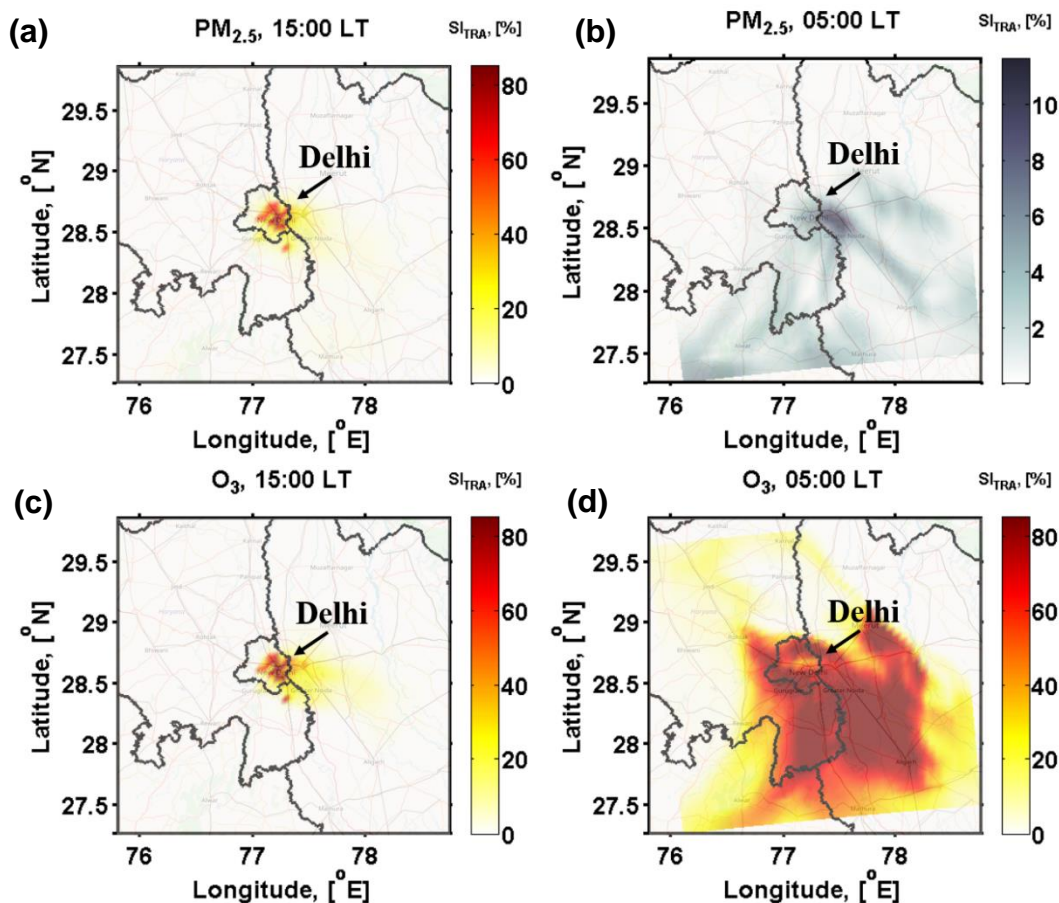

**Figure S11.** Horizontal distribution of sensitivity index for local traffic emissions in Delhi ( $SI_{TRA}$ ). The model results are averaged over 02-15 May 2015. Sensitivity indices are shown for: (a)  $PM_{2.5}$  during ozone peak hour (15:00 LT), (b)  $PM_{2.5}$  before PBL developed (05:00 LT), (c)  $O_3$  at 15:00 LT, and (d)  $O_3$  at 05:00 LT. Noting that the scale of colorbar in panel (b) is different from the others.

**Supplementary References:**

Chatani, S., and Sharma, S.: Uncertainties Caused by Major Meteorological Analysis Data Sets in Simulating Air Quality Over India, *Journal of Geophysical Research: Atmospheres*, 123, 6230-6247, doi:10.1029/2017JD027502, 2018.
